# Supplementary material for: Kinome capture sequencing of high-grade serous ovarian carcinoma reveals novel mutations in the JAK3 gene
Source: PubMed Central journal article supplement (PMC7343160; doi:10.1371/journal.pone.0235766), 2020-07-08

Figure 4- blot

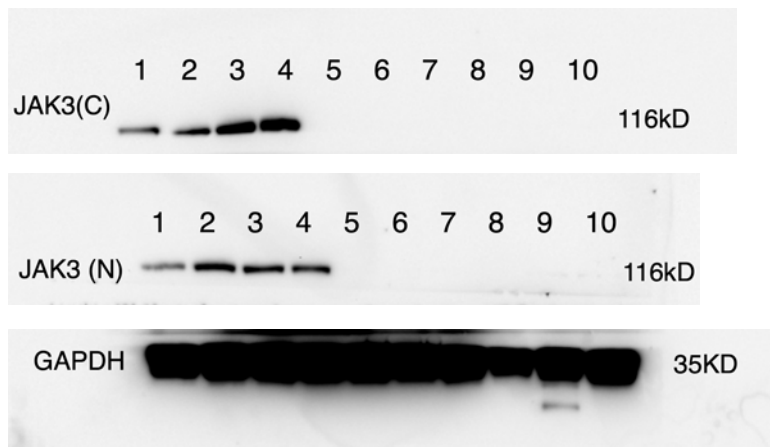

Figure 4- colorimetric

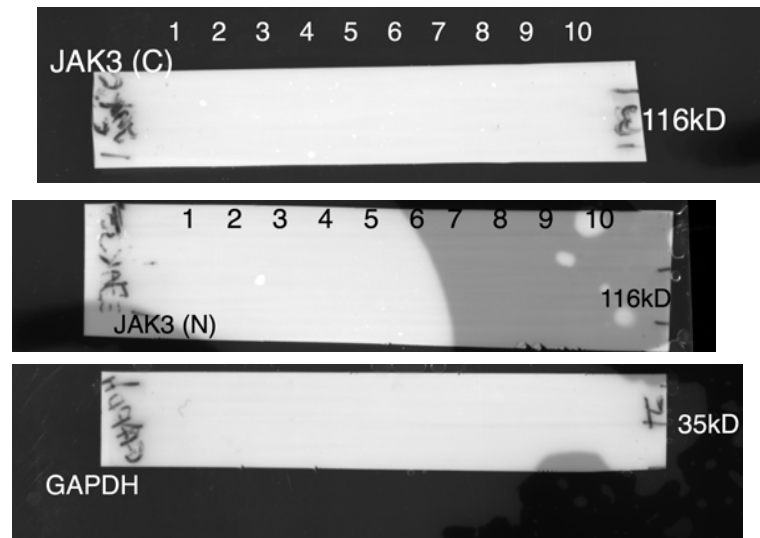

Figure 4- blot and colorimetric merged

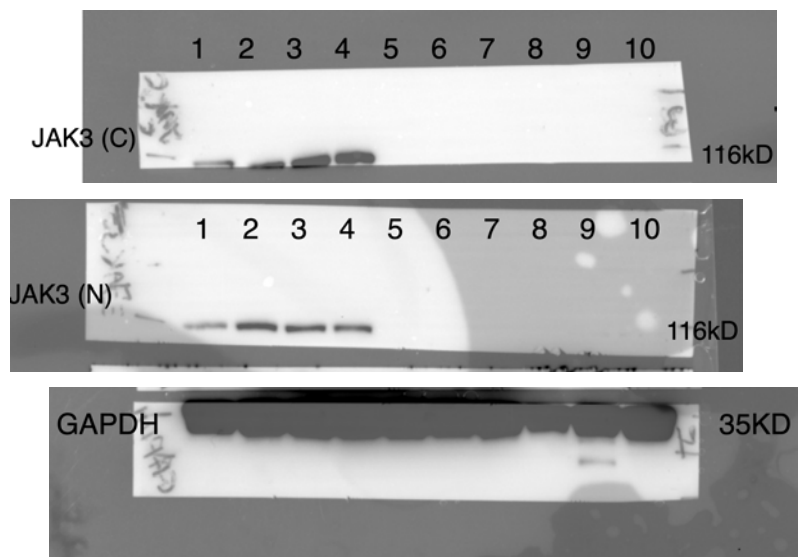

Figure 5- part 1, blot (high and low exposure)

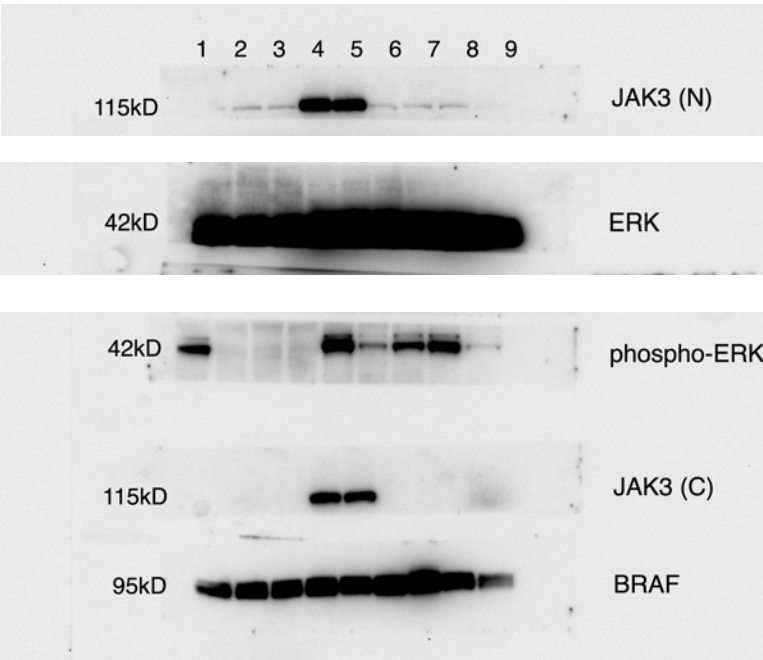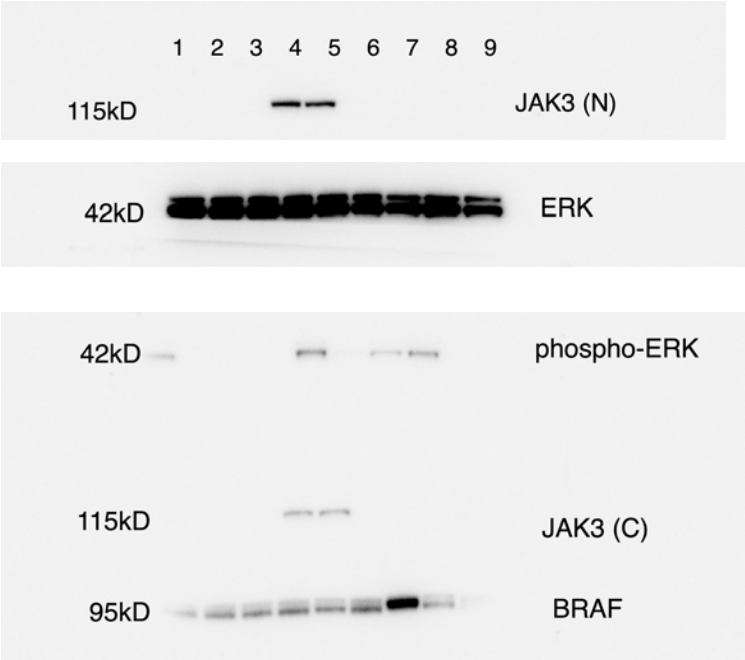

Figure 5- part 1, colorimetric

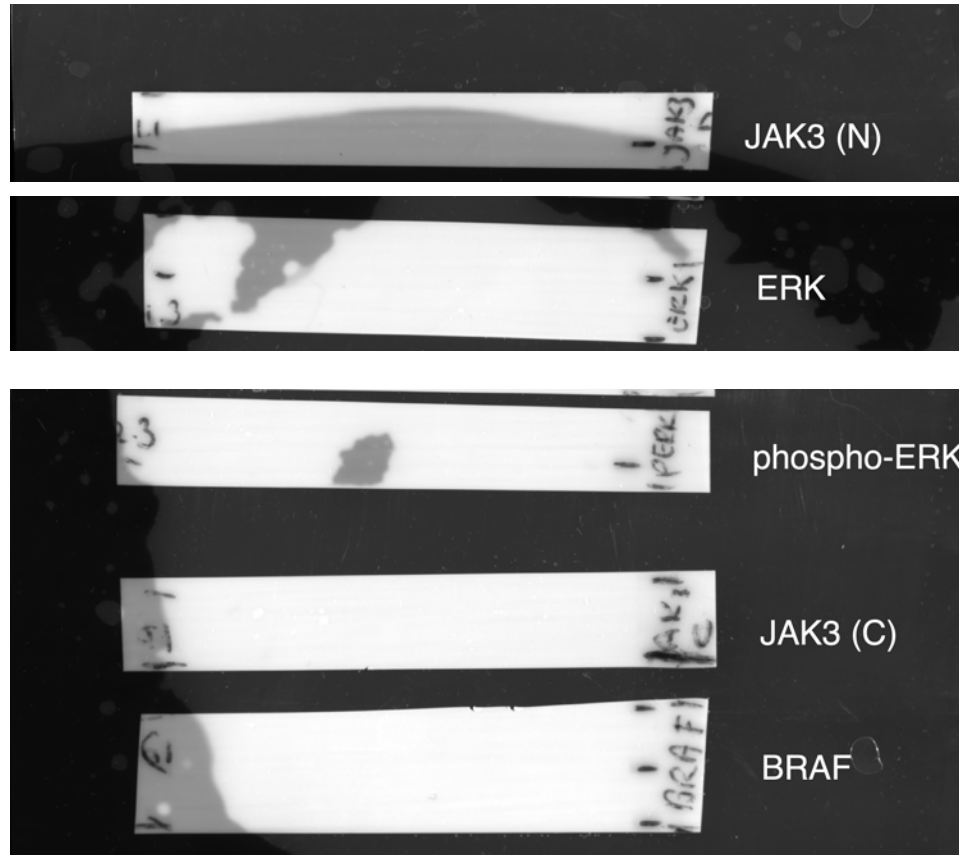

Figure 5- part 1, blot and colorimetric merged (high and low exposure)

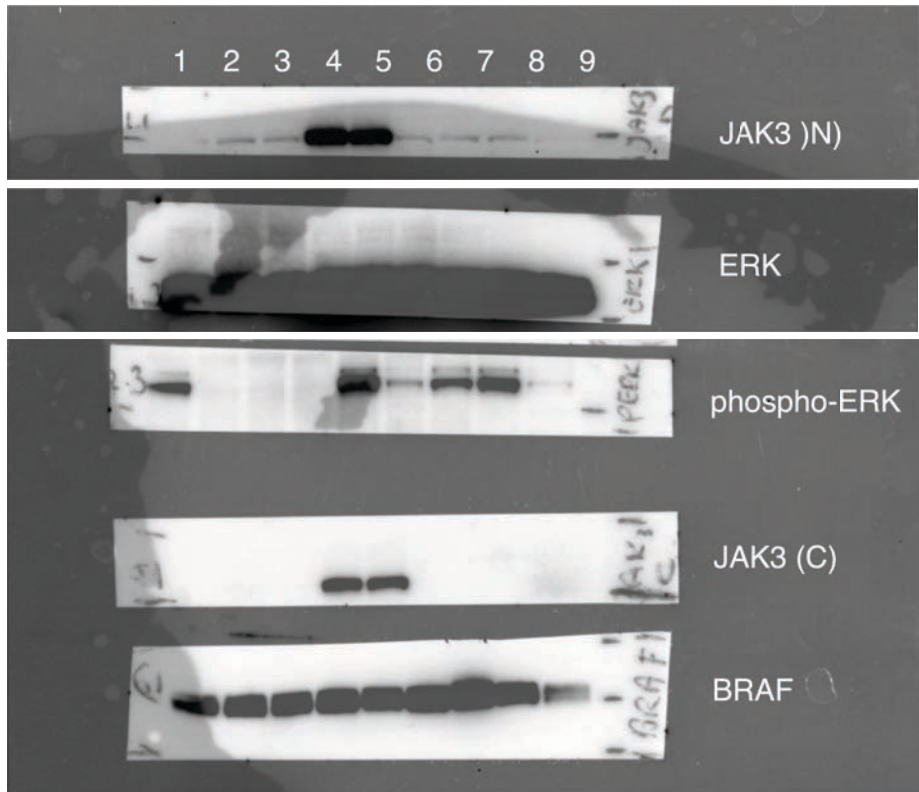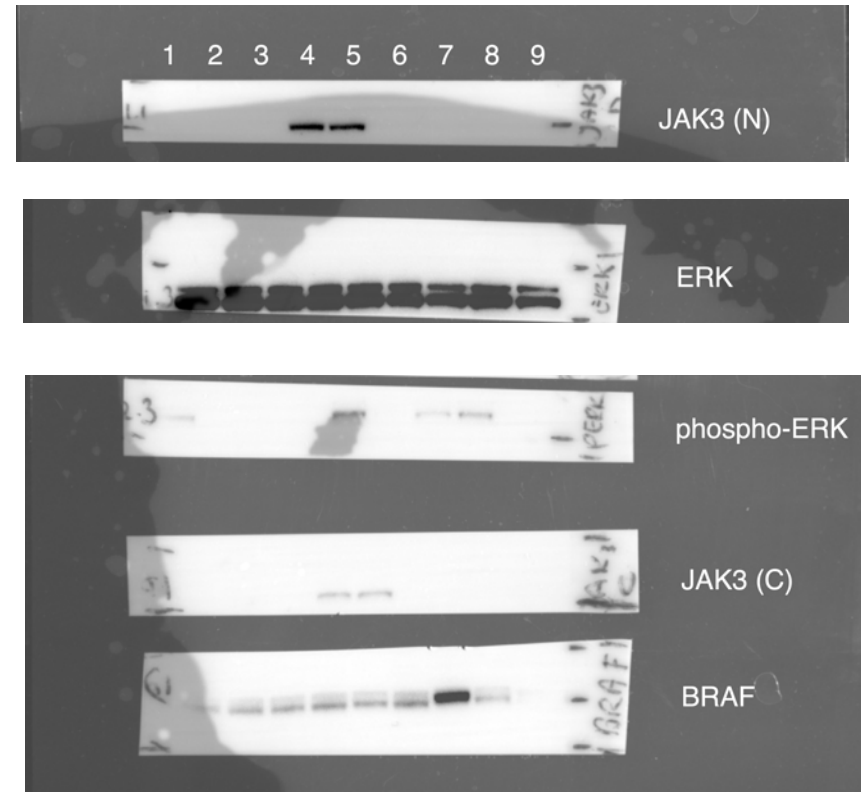

Figure 5- part 2, colorimetric

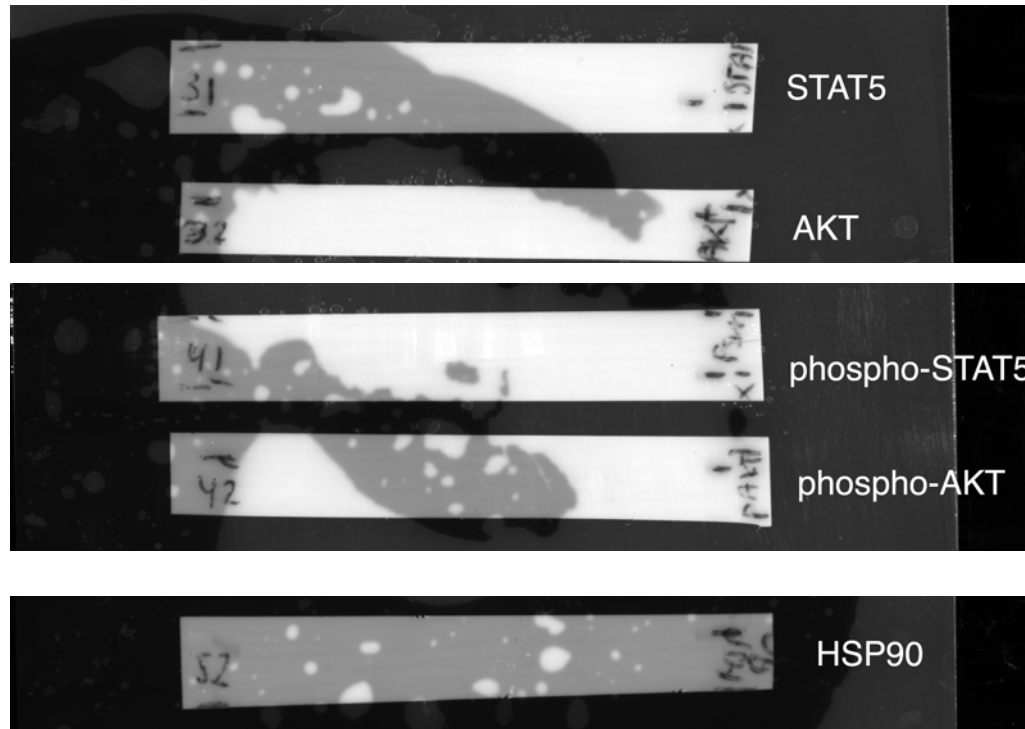

Figure 5- part 2, blot

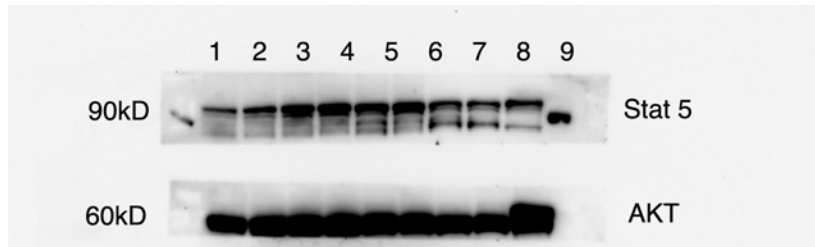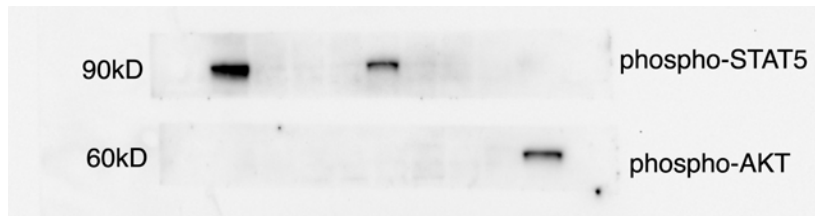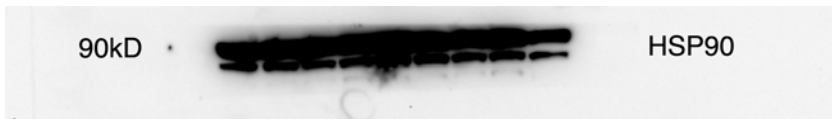

Figure 5- part 2 blot and colorimetric merged

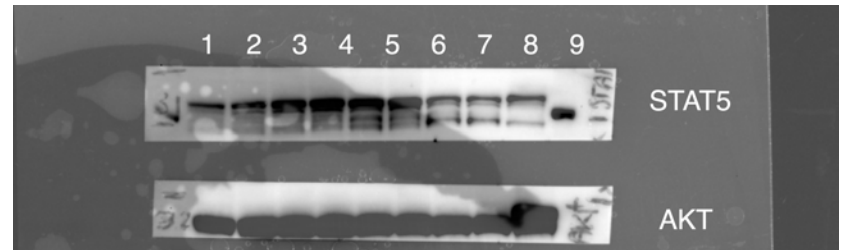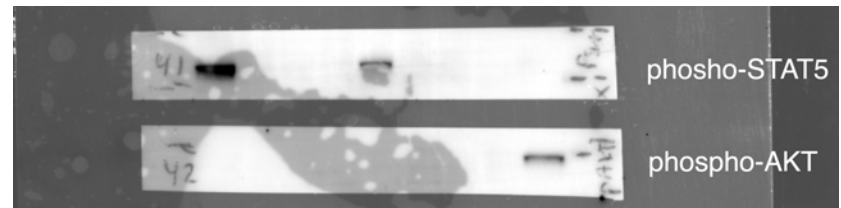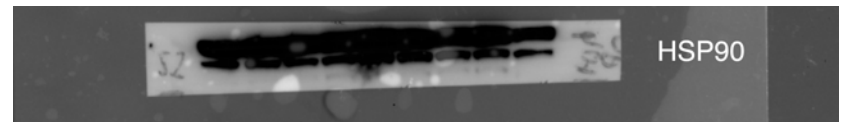

Supplement: pone.0235766.s012.pdf [file pone.0235766.s012.pdf]
